# Supplementary material for: Familial factors and child characteristics as predictors of injuries in toddlers: a prospective cohort study
Source: PubMed Central journal article supplement — BMJ Open. 2012 Mar 8;2(2):e000740. doi: 10.1136/bmjopen-2011-000740 (PMC3298835; doi:10.1136/bmjopen-2011-000740), 2012-03-08
Supplement: bmjopen-2011-000740.draft_revisions.pdf [file bmjopen-2011-000740.draft_revisions.pdf]

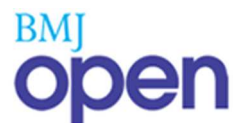

**Familial factors and child characteristics as predictors of injuries in toddlers: A prospective cohort study**

|                                 |                                                                                                                                                                                                                                                                                                                                                                          |
|---------------------------------|--------------------------------------------------------------------------------------------------------------------------------------------------------------------------------------------------------------------------------------------------------------------------------------------------------------------------------------------------------------------------|
| Journal:                        | <i>BMJ Open</i>                                                                                                                                                                                                                                                                                                                                                          |
| Manuscript ID:                  | bmjopen-2011-000740                                                                                                                                                                                                                                                                                                                                                      |
| Article Type:                   | Research                                                                                                                                                                                                                                                                                                                                                                 |
| Date Submitted by the Author:   | 14-Dec-2011                                                                                                                                                                                                                                                                                                                                                              |
| Complete List of Authors:       | Myhre, Mia Cathrine; Norwegian Centre for Violence and Traumatic Stress Studies,<br>Thoresen, Siri; Norwegian Centre for Violence and Traumatic Stress Studies,<br>Grøgaard, Jens; Oslo University Hospital, Department of Pediatrics<br>Dyb, Grete; Norwegian Centre for Violence and Traumatic Stress Studies, ;<br>University of Oslo, Institute of Clinical Medicine |
| <b>Primary Subject Heading</b>: | Paediatrics                                                                                                                                                                                                                                                                                                                                                              |
| Secondary Subject Heading:      | Epidemiology                                                                                                                                                                                                                                                                                                                                                             |
| Keywords:                       | Community child health < PAEDIATRICS, Developmental neurology & neurodisability < PAEDIATRICS, EPIDEMIOLOGY                                                                                                                                                                                                                                                              |
|                                 |                                                                                                                                                                                                                                                                                                                                                                          |

SCHOLARONE™  
Manuscripts

Peer Review Only

1  
2  
3 FAMILIAL FACTORS AND CHILD CHARACTERISTICS AS PREDICTORS OF  
4 INJURIES IN TODDLERS: A PROSPECTIV COHORT STUDY  
5  
6  
7  
8

9 PREDICTORS OF INJURIES IN TODDLERS: A PROSPECTIV COHORT STUDY  
10  
11  
12

13  
14 Mia Cathrine Myhre

15 Norwegian Centre for Violence and Traumatic Stress Studies

16  
17 Kirkeveien 166

18  
19 N-0450 OSLO

20  
21 Norway

22  
23 Phone: +47 22 59 55 00, Fax: +47 22 59 55 01

24  
25 E-mail: m.c.myhre@nkvts.unirand.no  
26  
27  
28  
29

30 Mia Cathrine Myhre <sup>A, B</sup>

31  
32 Siri Thoresen <sup>A</sup>

33  
34 Jens Grøgaard <sup>B</sup>

35  
36 Grete Dyb <sup>A, C</sup>

37  
38 Norwegian Centre for Violence and Traumatic Stress Studies, Oslo, Norway <sup>A</sup>

39  
40 Department of pediatrics, Oslo University Hospital - Ullevål, Oslo, Norway <sup>B</sup>

41  
42 Institute of Clinical Medicine, University of Oslo, Oslo, Norway <sup>C</sup>  
43  
44  
45  
46  
47  
48  
49  
50  
51

52 Key words: *epidemiology, injury prevention, child community health, the Norwegian Mother*  
53 *and Child Cohort Study*  
54

55 Word Count: 2961  
56  
57  
58  
59  
60

## ABSTRACT

**Objective:** To identify characteristics that put toddlers at risk of injuries, and to assess the relative importance of child-related risk factors compared to familial risk factors for injuries in toddlers.

**Design:** A prospective cohort study

**Setting:** This study was based on the Norwegian Mother and Child Cohort Study, conducted by the Norwegian Institute of Public Health.

**Participants:** The study sample consisted of 26,087 children and their mothers.

**Outcome measures:** Family and child characteristics measured before or at 18 months of age were investigated as potential predictors of hospital-attended injuries that occurred between 18 and 36 months of age.

**Results:** In the multivariable analysis, younger maternal age OR 0.93 (95% CI 0.86, 1.00), financial problems OR 1.18 (95% CI 1.01, 1.39), maternal mental distress OR 1.09 (95% CI 1.03, 1.16), having older siblings OR 1.22 (95% CI 1.08, 1.39), increased gestational age at birth OR 1.04 (95% CI 1.00, 1.07) and male gender OR 1.26 (95% CI 1.11, 1.42) were risk factors for hospital-attended injuries. Children with impaired gross motor development had a decreased risk of injury OR 0.65 (95% CI 0.42, 0.99), whereas those with impaired fine motor development had an increased risk OR 1.55 (95% CI 1.22, 1.97). Shyness was a protective factor OR 0.92 (95% CI 0.86, 0.98). Children with three reported attention problems had a slightly increased risk of hospital-attended injuries (95% CI OR 1.33 (1.02, 1.72),  $p = 0.035$ ), otherwise, behaviour was not a significant risk factor.

**Conclusions:** The effect sizes of several child-related risk factors were substantially attenuated when adjusted for familial risk factors. Conversely, effect estimates for familial risk factors were not much altered following adjustment for child-related factors. This study suggests that familial factors are robust predictors of injuries in young children.

### Article focus

- To identify characteristics that put toddlers at risk of injuries in a large prospective cohort study.
- Several risk factors related both to the child's family situation and individual characteristics of the child have been identified, this study assessed the relative importance of child-related risk factors compared to familial risk factors for injuries in toddlers.

### Key Messages

- The assessment of several familial and child related characteristics together as predictor for hospital attended injuries in toddlers provided evidence that familial factors are more robust predictors of injuries in toddlers than child factors.
- Children with impaired gross motor development had a decreased risk of injury, whereas those with impaired fine motor development had an increased risk, and the timing of preventive measures against injuries should be based on motor development in young children and not on age.

### Strengths and limitations of this study

- The strengths of this study included its prospective design, large sample size and the inclusion of a large number of potentially important variables.
- A response rate of 42.7% suggests a selection bias, and comparisons with registry data have shown a positive selection into this cohort.
- This study's reliance on self-reported data may have affected the response accuracy, and there may be information biases
- The use of abbreviated scales might have threatened the validity of measures.

## INTRODUCTION

Injuries are a major cause of morbidity and mortality in toddlers.[1] The incidence of injury, mechanisms of trauma and type of injury vary with children's ages and developmental stages.[2,3] Before adolescence, the highest rate of injury occurs in toddlers 15-17 months of age.[2] Falls are consistently the leading cause of non-fatal injuries in toddlers, followed by poisoning and transportation-related injuries.[2,3] Wounds and head injuries are the most common types of injury.[3]

Until the 1960s, injuries were considered accidental in the sense of being random acts of misfortune. Although they are still referred to as 'accidents', events that result in injuries are no longer regarded as unpredictable; rather, they are thought to have a causal sequence with identifiable risk factors.[4] Several studies have since reported that risk factors related both to the child's family situation and individual characteristics of the child are associated with injuries in children.

Low familial socioeconomic status[5-7] and related aspects, including low parental education, young maternal age, single motherhood, large family size, unemployment and substance abuse, are established risk factors for injuries in children.[6-8] More recently, researchers have found associations between the mother's mental health and an increased risk of injury in toddlers.[9,10] Adequate adult supervision is essential for toddlers to stay free from harm, [11-13] and mothers mental distress may reduce the ability to meet children's needs and may impact awareness of children's safety.

Male sex is probably the best established risk factor for injury, and gender-specific behaviours such as rough play and taking risks are believed to contribute to this association in children.[14] Potentially important predictors that have received less attention in the literature include preterm birth and psychomotor development. Many studies have identified cognitive and behavioural consequences of preterm birth; however, few have examined these

1  
2  
3 consequences in relation to the risk of later injury. Similarly, the relationship between  
4  
5 psychomotor development and the risk of injury is not well established, as the few studies that  
6  
7 have been conducted show conflicting results.[15-17] However, there is considerable  
8  
9 individual variation in toddlers' motor development, and their physical development precedes  
10  
11 their ability to understand the consequences of their actions. Motor ability may therefore be of  
12  
13 specific importance as a risk factor for injuries in this age group.

14  
15  
16       Temperamental attributes in children have been associated with proneness to injury,  
17  
18 including a high activity level, impulsiveness, sensation seeking and poor inhibitory  
19  
20 control.[14] Each of these traits contributes to children's tendencies to place themselves in  
21  
22 potentially dangerous situations. Externalising behaviours may also be challenging in toddlers  
23  
24 and can affect child safety.[14,18] Attention problems may affect a child's ability to recognise  
25  
26 potential environmental hazards and to comply with their supervisor's instructions and rules.  
27  
28 Aggression and related high levels of oppositional behaviour makes it difficult for parents to  
29  
30 control their children and keep them safe from harm. [14,18-20]  
31  
32

33  
34       Many unintentional injuries among young children are the results of inadequate  
35  
36 supervision. Supervision exist on a spectrum from keeping a child overly protected and  
37  
38 thereby denied opportunities to develop towards inadequate supervision and boundary setting  
39  
40 exposing a child to avoidable harm. Also, some injuries in children are the results from child  
41  
42 abuse, and in toddlers, up to 10% of injuries evaluated in emergency departments have been  
43  
44 reported to be intentional. [21]  
45  
46

47  
48       The aim of this study was to assess the relative importance of child factors compared  
49  
50 to familial factors for injuries requiring hospital admission in toddlers. Research, mainly on  
51  
52 older children, has identified a range of characteristics of children and several familial factors  
53  
54 as risk factors for injuries in childhood, but few have assessed the relative importance of such  
55  
56 factors in young children. The Norwegian Mother and Child Cohort Study (MoBa), with its  
57  
58  
59  
60

1  
2  
3 comprehensive data collection over several waves offered a unique opportunity to assess these  
4  
5 relationships prospectively in a large-scale, population-based study.  
6  
7

## 8 9 10 **METHODS**

### 11 12 **Design and Participants**

13  
14 This study used data from the Norwegian Mother and Child Cohort Study (MoBa),  
15 conducted by the Norwegian Institute of Public Health. MoBa is a prospective population-  
16 based pregnancy cohort study with a target population of all pregnant women in Norway and  
17 their children. The women were recruited to the study at approximately week 17 of gestation  
18 through postal invitations prior to routine ultrasound examinations at their local hospitals. The  
19 study included 108,000 pregnancies; recruitment began in 1999 and was completed in 2008.  
20 The response rate was 42.7% .[22] Questionnaire data were collected at gestational weeks 17  
21 and 30 and at child ages of 6, 18, and 36 months. Information from the MBRN was also  
22 available ([www.fhi.no/mfr](http://www.fhi.no/mfr)). Informed consent was obtained from each participant upon  
23 recruitment. The Regional Committee for Medical Research Ethics and the Norwegian Data  
24 Inspectorate approved the study. Details of the MoBa study's sampling, design,  
25 questionnaires, informed consent processes, and data collection strategies have been reported  
26 elsewhere ([www.fhi.no/morogbarn](http://www.fhi.no/morogbarn)).[22]  
27  
28  
29  
30  
31  
32  
33  
34  
35  
36  
37  
38  
39  
40  
41  
42  
43  
44

45 Although recruitment to the study is complete, data collection is an on-going process.  
46 The current study is based on data files released for research on February 2009. This file  
47 comprised the first 27,227 children and their mothers who had completed the questionnaires  
48 when their children were 36 months of age. Cases with missing data on hospital attended  
49 injuries in the children were excluded (N = 1,140), and the study sample comprised 26,087  
50 children and mothers.  
51  
52  
53  
54  
55  
56  
57  
58  
59  
60

## Injuries

At 36 months of age, injuries in toddlers were assessed using the following questions: “Has your child suffered any injury or accident since the age of 18 months?” and “If yes, has the child been admitted to or examined in hospital?” The response categories to both items were “yes” or “no”. The outcome variable in our study was an affirmative answer for hospital-attended injuries.

## Familial factors

Demographic information regarding older siblings, maternal age, maternal education, and occupational status was reported at gestational week 17. At child’s age 18 months, whether the mother and child lived with the child’s father was assessed with the following question: “Do you and your child live with your child’s father?” Current financial problems were assessed with the following questions: “Have you had financial problems since the previous questionnaire?” The response categories were “yes” or “no”. Data on ethnicity were not available at the individual level in this study; however, the MoBa cohort comprised predominantly ethnic Norwegian and Scandinavian families (95%).

## *Maternal mental health*

The mother’s mental health was assessed when the child was 18 months of age with the Symptom Checklist SCL-8.[23,24] The SCL-8 is designed to measure psychological distress, particularly anxiety and depression, in population surveys. Each item has four response categories, ranging from “not at all”=1 to “severe”=4.[25] Cronbach’s  $\alpha$  was 0.84.

## Child factors

Information regarding the child’s sex, birth weight, and gestational age was retrieved from the MBRN.



### *Child development*

Development was assessed using items derived from the Norwegian version of the Ages and Stages Questionnaire (ASQ). The ASQ was designed for first-level screening and to monitor developmental delay in children.[26] When the child was 18 months of age, development was assessed using three items from the gross motor area, three items from the fine motor area, three items from the communication area, and four items from the personal–social area of the ASQ 18 months form. The choice of responses was “not yet”, “sometimes” or “yes”. Responses of “not yet” and “sometimes” are indicative of delayed development and were categorised jointly as “not yet”. The number of developmental skills that were not achieved was summarised, and the following 3 categories were formed: “all skills achieved”, “one skill not achieved” and “two or more skills not achieved”.

### *Child temperament*

The Emotionality, Activity, Shyness, and Sociability Temperament Survey for Children (EAS)[27] was used to assess temperament at 18 months of age. Three items from each of the emotionality, activity, and shyness subscales were included. “Emotionality” refers to the tendency to become easily and intensely aroused or upset. “Activity” refers to the preferred level of activity and speed of action. “Shyness” refers to the tendency to be inhibited and awkward in new social situations. Each item was rated using a five-point scale, ranging from “not typical” = 1 to “very typical” = 5. Cronbach’s  $\alpha$  was 0.64 for emotionality, 0.64 for activity, and 0.65 for shyness.

### *Child behaviour*

Child externalising behaviour was assessed using items from the Child Behaviour Checklist (CBCL) for ages 1.5 to 5 years[28] when the child reached 18 months of age. Five items assessing aggressiveness and three items assessing attention problems were available. All items were rated “not true”, “somewhat or sometimes true”, and “very true or often true”.

1  
2  
3 “Somewhat or sometimes true” and “very true or often true” were categorised together to  
4 indicate problem behaviours. The number of problems were summarised and then categorised  
5 as “no problems”, one, two or three problems for the attention subscale and one, two or three  
6 or more problems for the aggressiveness subscale.  
7  
8  
9  
10

### 11 12 13 14 **Statistical Analysis**

15  
16 Predictors of hospital-attended injuries in children were analysed using logistic  
17 regression with a Generalised Estimating Equation (GEE) approach to account for correlation  
18 due to the inclusion of siblings in the study sample. Associations are presented as crude odds  
19 ratios (cORs) and adjusted odds ratios (aORs) with 95% confidence intervals [95% CI]. The  
20 corresponding tests for significance were performed using the Wald-test statistic and a  
21 significance level of  $P < 0.05$ . The sum scores of independent continuous measures were  
22 standardised, and the presented odds ratios represent the difference in risk for an increase of  
23 one standard deviation. Measures with internal consistency of Cronbach’s  $\alpha < 0.60$  were  
24 categorised. Variance inflation factors were computed to assess multicollinearity. The model  
25 was cross-validated in two randomly selected subsamples. Stratification by gender produced  
26 only minor differences in effect estimates of potential risk factors. The rate of missing  
27 information ranged from 0% to 11.9%. Modelling was based on 20 multiply imputed datasets.  
28  
29 Multivariate Imputation by Chained Equations (MICE) was used for imputations.  
30  
31 All analyses were performed using R (The R Foundation for Statistical Computing, Vienna,  
32 Austria) with the R packages gee for logistic regression using GEE, and MICE for multiple  
33 imputation.  
34  
35  
36  
37  
38  
39  
40  
41  
42  
43  
44  
45  
46  
47  
48  
49  
50  
51  
52  
53  
54  
55  
56  
57  
58  
59  
60

## RESULTS

The study sample comprised 50.7% males, with 53% of the children having older siblings. The mean gestational age at birth was 39.4 weeks (SD = 2.0). Maternal age ranged from 14 to 47 years, with a mean of 29.7 years (SD = 4.4). The majority of mothers (60.5%) had more than 12 years of education. Only 0.9% of the subjects (N = 252) were teenage mothers, and 3.4% (N=853) reported not living with the father of their child. Four per cent of mothers were unemployed or disabled. Current financial problems were reported by 18.5% of mothers. A hospital-attended injury between 18 and 36 months of age was reported for 4.6% (N = 1,247) of the children.

Table 1 displays univariable and multivariable comparisons between children with and without hospital-attended injuries. In unadjusted analyses, a range of factors were significantly associated with injuries, including maternal mental distress, financial problems, gender, gestational age at birth, development, temperament and behaviour.

Similarly, several potential predictors were significantly associated with hospital-attended injuries in toddlers in the multivariable analyses.

### *Familial factors*

In the adjusted model, financial problems, maternal mental distress and having older siblings were risk factors for hospital-attended injuries in toddlers. Older maternal age was a protective factor. Maternal education, occupational status and not living with the child's father were not associated with hospital-attended injuries.

### *Child factors*

Male gender and increased gestational age at birth were risk factors for hospital-attended injuries in the toddlers. Children with impaired gross motor development were less prone to injury, whereas children with less fine motor skills were more at risk. Social development was not significantly associated with hospital-attended injuries. Impaired

communication, the temperamental traits of emotionality and activity and aggressive behaviour did not achieve statistical significance in the adjusted analysis. Following adjustment shyness remained a protective factor and children with at least three reported attention problems had a modestly increased risk for hospital-attended injuries ( $p = 0.035$ ).

**Table 1**

Descriptive comparison between children with and without hospital attended injuries and univariable and multivariable logistic regression analysis of potential risk factors, N=26087.

|                                             | Overall<br>N=26087 | Without injuries | With<br>injuries |                      |                      |
|---------------------------------------------|--------------------|------------------|------------------|----------------------|----------------------|
|                                             | % (N)              | % (N)            | % (N)            |                      |                      |
|                                             | /mean(SD)          | /mean(SD)        | /mean(SD)        | OR (95% CI)          | aOR (95% CI)         |
| <i>Family factors</i>                       |                    |                  |                  |                      |                      |
| Older sibling(s)                            | 53.3% (13902)      | 53.1% (13197)    | 56.5% (705)      | 1.15 (1.02, 1.29)*   | 1.22 (1.08, 1.39)**  |
| Maternal age                                | 29.7 (4.43)        | 29.7 (4.44)      | 29.5 (4.44)      | 0.95 (0.89, 1.02)    | 0.93 (0.86, 1.00)*   |
| Maternal education $\leq$ 12 years          | 37.6% (9534)       | 37.6% (9078)     | 37.6% (456)      | 0.99 (0.88, 1.12)    | 0.90 (0.80, 1.02)    |
| Mother unemployed or disabled               | 4.1% (1069)        | 4.1% (1017)      | 4.2% (52)        | 1.01 (0.76, 1.36)    | 0.95 (0.71, 1.26)    |
| Mother and child not living with the father | 3.4% (819)         | 3.4% (778)       | 3.6% (41)        | 1.06 (0.77, 1.46)    | 0.96 (0.69, 1.33)    |
| Financial problems                          | 18.6% (4379)       | 18.4% (4129)     | 22.4% (250)      | 1.27 (1.09, 1.48)**  | 1.18 (1.01, 1.39)*   |
| Maternal mental health problems (8-32)      | 10.2 (2.84)        | 10.1 (2.82)      | 10.5 (3.06)      | 1.12 (1.06, 1.18)*** | 1.09 (1.03, 1.16)**  |
| <i>Child factors</i>                        |                    |                  |                  |                      |                      |
| Male                                        | 50.8% (13250)      | 50.5% (12540)    | 56.9% (710)      | 1.30 (1.16, 1.45)*** | 1.26 (1.11, 1.42)*** |
| Gestational age                             | 39.4 (1.94)        | 39.4 (1.96)      | 39.5 (1.79)      | 1.04 (1.01, 1.07)*   | 1.04 (1.00, 1.07)*   |
| Gross motor development                     |                    |                  |                  |                      |                      |
| All skills achieved                         | 82.2% (19742)      | 82.1% (18794)    | 83.8% (948)      | Reference            | Reference            |
| One skill not achieved                      | 14.5% (3481)       | 14.5% (3322)     | 14.1% (159)      | 0.94 (0.80, 1.12)    | 0.94 (0.79, 1.12)    |
| Two or three skills not achieved            | 3.4% (800)         | 3.4% (776)       | 2.1% (24)        | 0.65 (0.43, 0.98)*   | 0.65 (0.42, 0.99)*   |

|                           |                                   |               |               |             |                      |                      |
|---------------------------|-----------------------------------|---------------|---------------|-------------|----------------------|----------------------|
| Fine motor development    |                                   |               |               |             |                      |                      |
|                           | All skills achieved               | 73.8% (17569) | 73.9% (16754) | 72.3% (815) | Reference            | Reference            |
|                           | One skill not achieved            | 21.0% (5004)  | 21.0% (4774)  | 20.4% (230) | 1.01 (0.87, 1.18)    | 1.03 (0.89, 1.19)    |
|                           | Two or three skills not achieved  | 5.2% (1236)   | 5.1% (1154)   | 7.3% (82)   | 1.45 (1.15, 1.83) ** | 1.55 (1.22, 1.97)*** |
| Communication development |                                   |               |               |             |                      |                      |
|                           | All skills achieved               | 46.6% (11117) | 46.8% (10631) | 43.1% (486) | Reference            | Reference            |
|                           | One skill not achieved            | 26.5% (6313)  | 26.4% (5989)  | 28.7% (324) | 1.16 (1.00, 1.34) *  | 1.11 (0.95, 1.28)    |
|                           | Two or three skills not achieved  | 26.93% (6413) | 18.3% (6095)  | 19.3% (318) | 1.13 (0.98, 1.31)    | 1.04 (0.89, 1.22)    |
| Social development        |                                   |               |               |             |                      |                      |
|                           | All skills achieved               | 71.3% (17094) | 71.4% (16302) | 70.3% (792) | Reference            | Reference            |
|                           | One skill not achieved            | 19.6% (4688)  | 19.5% (4451)  | 21.0% (237) | 1.09 (0.94, 1.27)    | 1.04 (0.90, 1.21)    |
|                           | Two or more skill not achieved    | 6.6% (1582)   | 6.6% (1510)   | 6.4% (72)   | 0.99 (0.77, 1.26)    | 0.92 (0.73, 1.15)    |
| Temperament               |                                   |               |               |             |                      |                      |
|                           | Activity (3-15)                   | 12.1 (1.96)   | 12.1 (1.96)   | 12.2 (1.97) | 1.09 (1.02, 1.16) ** | 1.02 (0.95, 1.09)    |
|                           | Emotionality (3-15)               | 8.2 (2.27)    | 8.2 (2.26)    | 8.3 (2.37)  | 1.06 (0.99, 1.12)    | 1.02 (0.96, 1.09)    |
|                           | Shyness (3-15)                    | 6.1 (1.93)    | 6.1 (1.93)    | 6.0 (1.95)  | 0.92 (0.87, 0.98)**  | 0.92 (0.86, 0.98) *  |
| Externalizing behaviour   |                                   |               |               |             |                      |                      |
| Attention                 |                                   |               |               |             |                      |                      |
|                           | No attention problem              | 10.7% (2464)  | 10.8% (2371)  | 8.7% (93)   | Reference            | Reference            |
|                           | One attention problem             | 41.9% (9653)  | 42.1% (9231)  | 39.3% (422) | 1.15 (0.91, 1.44)    | 1.13 (0.89, 1.43)    |
|                           | Two attention problems            | 28.7% (6611)  | 28.7% (6288)  | 30.0% (323) | 1.26 (1.00, 1.60)    | 1.19 (0.93, 1.53)    |
|                           | Three attention problems          | 18.7% (4294)  | 18.5% (4057)  | 22.0% (237) | 1.47 (1.16, 1.86)**  | 1.33 (1.02, 1.72) *  |
| Aggression                |                                   |               |               |             |                      |                      |
|                           | No aggression problem             | 14.6% (3278)  | 14.6% (3151)  | 12.1% (127) | Reference            | Reference            |
|                           | One aggression problem            | 22.8% (5953)  | 26.3% (5685)  | 25.5% (268) | 1.13 (0.92, 1.38)    | 1.07 (0.87, 1.31)    |
|                           | Two aggression problems           | 24.3% (6332)  | 27.9% (6018)  | 29.8% (314) | 1.21 (0.99, 1.47)    | 1.09 (0.89, 1.34)    |
|                           | Three or more aggression problems | 27.2% (7091)  | 31.2% (6747)  | 32.7% (344) | 1.21 (1.00, 1.47)    | 1.01 (0.82, 1.25)    |

\* p value < 0.05, \*\*p value < 0.01, \*\*\*p value < 0.001 from Wald-test statistic

## DISCUSSION

The current population-based study of toddlers found that both familial factors and developmental factors in children were associated with injury risk, but that familial factors were more robust predictors of injuries. These findings are consistent with previous studies and our clinical experience; children admitted to hospitals with injuries are not randomly selected.

Similar to earlier studies,[8] having older siblings was a risk factor for hospital-attended injuries. Differences in parental supervision or the possibility that older siblings sometimes act as supervisors may explain this association. Research has shown that children are allowed to engage in more risky behaviour and show poor compliance when supervised by their older siblings rather than by their mothers.[29]

Education and socioeconomic status are closely intertwined, and most prior studies have found that low maternal education is a risk factor for injuries in children. In this study, maternal education, unemployment and single parenthood were not associated with injury. This lack of association may be due to the generally high educational level, well-developed social security system, and high standard of living in Norway. Financial problems, which were significantly associated with injury, were reported by a rather large proportion of the mothers in this study and are not likely to represent poverty, but perhaps problems to adapt to a life situation with a growing family. As in other studies older maternal age was a protective factor.[6,7]

In line with previous research maternal mental health problems constituted a risk factor for injuries in children.[9,10] Mental distress may reduce a parent's attention to external cues, and may negatively impact the parent-child relationship. Maternal mental distress withstood adjustment for other familial and child-related predictors. This observation calls for further investigation of the mechanisms involved.

1  
2  
3 Behavioural and temperamental differences between boys and girls have been  
4  
5 proposed as explanations for the well-established relationship between gender and injury risk.  
6  
7 In this study, adjustment for development, temperament, and behaviour did barely attenuate  
8  
9 this relationship. Perhaps other differences, for example gender-specific socialisation,  
10  
11 supervision and guidance, games and encouraged activities, might explain this disparity.  
12  
13

14 Our finding that the risk of injury is increased with increasing gestational age at birth  
15  
16 was unanticipated. Many studies have identified later behavioural problems, including  
17  
18 attention deficit and hyperactivity in children who are born preterm, [30] attributes that are  
19  
20 also linked to injury proneness. On the other hand studies of adolescents have suggested that  
21  
22 children born at extremely low birth weight are more cautious, shy and risk averse than their  
23  
24 normal birth weight counterparts [31], and our finding might be explained by such attributes.  
25  
26 More research is needed to confirm and explain this finding.  
27  
28

29 Novel findings in this study were that children with impaired gross motor development  
30  
31 had a decreased risk for injury, whereas those with impaired fine motor development had an  
32  
33 increased risk. Toddlers' physical development often precedes their ability to understand the  
34  
35 consequences of their actions, and early physical mobility may put children at greater risk of  
36  
37 injury, regardless of their temperament, behaviour or environment. Impaired fine motor  
38  
39 development may be linked to clumsiness, which subsequently leads to injury proneness.  
40  
41 Alternatively, early fine motor development may reflect a preference for calmer activities.  
42  
43 The different directionalities of the associations between gross and fine motor development  
44  
45 and injury risk imply that these areas should be assessed separately in future studies.  
46  
47  
48

49 Shyness was a consistent protective factor against injury. Shyness is considered to be  
50  
51 an inhibition to the unfamiliar and is associated with inhibitory control.[32,33] The protective  
52  
53 effect of shyness observed in this study indicates that inhibitory control may also be a  
54  
55 protective factor against injury in young children. Attention problems was borderline  
56  
57  
58  
59  
60

1  
2  
3 significant after adjustment and may be a risk factor for injuries in toddlers. Aggression was  
4  
5 not significant. These findings are different from the many studies concluding with child  
6  
7 behaviour as a predictor for injuries.[14,18-20] In our study the associations between  
8  
9 temperament and behavior, and injury were substantially attenuated when adjusted for family  
10  
11 factors without the contrary being observed. This finding provides support that familial  
12  
13 factors are more robust predictors of injuries in young children.  
14  
15

16  
17 There are some important limitations of this study. A response rate of 42.7% suggests  
18  
19 a selection bias, and comparisons with data from MBRN have shown a positive selection into  
20  
21 this cohort, [22,34] and the study sample can be regarded as a low-risk population; this fact  
22  
23 may have resulted in an underestimation of the true effect sizes. However, few significant  
24  
25 differences in exposure-outcome associations have been identified in studies of this  
26  
27 cohort,[34] and the positive associations found in this study is likely to be generalisable.  
28  
29

30  
31 This study's reliance on self-reported data may have affected the response accuracy.  
32  
33 Self-reported medically-attended or hospital-attended injuries are common measures in the  
34  
35 injury literature. However, injury recall has been shown to decrease with time and tends to be  
36  
37 more accurate for major injuries.[35,36] The expected over-representation of more recent  
38  
39 injuries and more severe injuries will however not affect the association measures. Our study  
40  
41 did not include systematic measures of injury severity, injury mechanism or injury type.  
42  
43 Another omitted variable in this study was adult supervision, which is an important factor in  
44  
45 preventing injuries in preschool children. This study was also unable to discriminate injuries  
46  
47 that resulted from abuse.  
48

49  
50 The sample predominantly comprised ethnic Norwegian participants, and did not  
51  
52 allow us to investigate the influence of ethnicity or culture. As in other large population  
53  
54 studies, there was extensive use of abbreviated scales that might threaten the validity of  
55  
56  
57  
58  
59  
60



1  
2  
3 measures. The strengths of this study included its prospective design, large sample size and  
4  
5 the inclusion of a large number of potentially important variables.  
6

7 An injury brings the family in contact with healthcare and gives professionals an  
8  
9 opportunity to identify potential risk factors. In addition, the fact that injuries may also be  
10  
11 caused by poor supervision and, sometimes neglect or abuse emphasize that a thorough  
12  
13 assessment of the circumstances surrounding injuries in young children is important to  
14  
15 identify families where children are at risk of further injury.  
16  
17  
18  
19

## 20 **Acknowledgements**

21  
22 We are grateful to all the participating families in Norway who take part in this on-going  
23  
24 cohort study.  
25  
26  
27

## 28 **Competing Interest**

29  
30  
31 None to declare  
32  
33  
34  
35

## 36 **Contributorship**

37  
38 MCM cleaned and analysed the data, and drafted and revised the paper. ST, JBG and GD  
39  
40 contributed to the interpretation of the data and critical revisions of the manuscript. All  
41  
42 authors have studied the manuscript in the form submitted, and have accepted the order of  
43  
44 authorship.  
45  
46  
47  
48

## 49 **Data sharing statement**

50  
51 Researchers can apply for access to data from the Norwegian Institute of Public health  
52  
53 <http://www.fhi.no>, dataaccess@fhi.no  
54  
55  
56  
57  
58  
59  
60

**Copyright**

The Corresponding Author, Mia Cathrine Myhre, has the right to grant on behalf of all authors and does grant on behalf of all authors, an exclusive licence on a worldwide basis to the BMJ Publishing Group Ltd, and its Licensees to permit this article (if accepted) to be published in Injury Prevention and any other BMJ PGL products and to exploit all subsidiary rights, as set out in our licence.”

**Funding**

The Norwegian Mother and Child Cohort Study is supported by the Norwegian Ministry of Health and the Ministry of Education and Research, NIH/NIEHS(contract no NO-ES-75558), NIH/NINDS (grant no.1 UO1 NS 047537-01), and the Norwegian Research Council/FUGE (grant no. 151918/S10). The current study did not receive any specific funding, but was conducted as part of the authors employment at the Norwegian Centre for Violence and Traumatic Stress Studies.

## References

1. Dowd MD, Keenan HT, Bratton SL. Epidemiology and prevention of childhood injuries. *Crit Care Med* 2002;30(11 Suppl):S385-92.
2. Agran PF, Anderson C, Winn D, et al. Rates of pediatric injuries by 3-month intervals for children 0 to 3 years of age. *Pediatrics* 2003;111(6 Pt 1):92.
3. Flavin MP, Dostaler SM, Simpson K, et al. Stages of development and injury patterns in the early years: a population-based analysis. *BMC Public health* 2006;6:187.
4. Haddon W. The changing approach to the epidemiology, prevention, and amelioration of trauma: the transition to approaches etiologically rather than descriptively based. *Am J Public Health Nation Health* 1968;58(8):1431-8.
5. Faelker T, Pickett W, Brison RJ. Socioeconomic differences in childhood injury: a population based epidemiologic study in Ontario, Canada. *Inj Prev* 2000;6(3):203-8.
6. Hjern A, Ringback-Weitof G, Andersson R. Socio-demographic risk factors for home-type injuries in Swedish infants and toddlers. *Acta Paediatr* 2001;90(1):61-8.
7. Laursen B, Nielsen JW. Influence of sociodemographic factors on the risk of unintentional childhood home injuries. *Eur J Public Health* 2008;18(4):366-70.
8. Bijur PE, Golding J, Kurzon M. Childhood accidents, family size and birth order. *Soc Sci Med* 1988;26(8):839-43.
9. Phelan K, Khoury J, Atherton H, et al. Maternal depression, child behavior, and injury. *Inj Prev* 2007;13(6):403-8.
10. Schwebel DC, Brezausek CM. Chronic maternal depression and children's injury risk. *J Pediatr Psychol* 2008;33(10):1108-16.
11. Morrongiello BA, Corbett M, Brison RJ. Identifying predictors of medically-attended injuries to young children: do child or parent behavioural attributes matter? *Inj Prev* 2009;15(4):220-5.

- 1  
2  
3 12. Schwebel DC, Brezausk CM, Ramey SL, et al. Interactions between child behavior  
4  
5 patterns and parenting: implications for children's unintentional injury risk. *J Pediatr*  
6  
7 *Psychol* 2004;29(2):93-104.  
8
- 9  
10 13. Morrongiello BA, Klemencic N, Corbett M. Interactions between child behavior patterns  
11  
12 and parent supervision: implications for children's risk of unintentional injury. *Child*  
13  
14 *Dev* 2008;79(3):627-38.  
15
- 16 14. Schwebel DC, Gaines J. Pediatric unintentional injury: behavioral risk factors and  
17  
18 implications for prevention. *J Dev Behav Pediatr* 2007;28(3):245-54.  
19
- 20 15. Manheimer DI, Mellinger GD. Personality characteristics of the child accident repeater.  
21  
22 *Child Dev* 1967;38(2):491-513.  
23
- 24 16. Angle CR. Locomotor skills and school accidents. *Pediatrics* 1975;56(5):819-22.  
25
- 26 17. Schwebel DC, Binder SC, Sales JM, et al. Is there a link between children's motor abilities  
27  
28 and unintentional injuries? *J Safety Res* 2003;34(2):135-41.  
29
- 30 18. Wazana A. Are there injury-prone children? A critical review of the literature. *Can J*  
31  
32 *Psychiatry* 1997;42(6):602-10.  
33
- 34 19. Bijur PE, Stewart-Brown S, Butler N. Child behavior and accidental injury in 11,966  
35  
36 preschool children. *Am J Dis Child* 1986;140(5):487-92.  
37
- 38 20. Byrne JM, Bawden HN, Beattie T, et al. Risk for injury in preschoolers: relationship to  
39  
40 attention deficit hyperactivity disorder. *Child Neuropsychol* 2003;9(2):142-51.  
41
- 42 21. DiScala C, Sege R, Li G, et al. Child abuse and unintentional injuries: a 10-year  
43  
44 retrospective. *Arch Pediatr Adolesc Med* 2000;154(1):16-22.  
45
- 46 22. Magnus P, Irgens LM, Haug K, et al. Cohort profile: the Norwegian Mother and Child  
47  
48 Cohort Study (MoBa). *Int J Epidemiol* 2006;35(5):1146-50.  
49
- 50 23. Tambs K, Moum T. How well can a few questionnaire items indicate anxiety and  
51  
52 depression? *Acta Psychiatr Scand* 1993;87(5):364-7.  
53  
54  
55  
56  
57  
58  
59  
60

- 1  
2  
3 24. Strand BH, Dalgard OS, Tambs K, et al. Measuring the mental health status of the  
4  
5 Norwegian population: a comparison of the instruments SCL-25, SCL-10, SCL-5 and  
6  
7 MHI-5 (SF-36). *Nord J Psychiatry* 2003;57(2):113-8.  
8  
9  
10 25. Sandanger I, Moum T, Ingebrigtsen G, et al. Concordance between symptom screening  
11  
12 and diagnostic procedure: the Hopkins Symptom Checklist-25 and the Composite  
13  
14 International Diagnostic Interview I. *Soc Psychiatry Psychiatr Epidemiol*  
15  
16 1998;33(7):345-54.  
17  
18  
19 26. Squires J PL, Bricker D *The ASQ User`s Guide for the Ages and Stages Questionnaires: A*  
20  
21 *Parent- Completed, Child Monitoring System*. Baltimore, MD: Paul H. Brookes.,  
22  
23 1999.  
24  
25 27. Mathiesen KS, Tambs K. The EAS temperament questionnaire--factor structure, age  
26  
27 trends, reliability, and stability in a Norwegian sample. *J Child Psychol Psychiatry*  
28  
29 1999;40(3):431-9.  
30  
31  
32 28. Aschenbach TM, Rescorla LA. *Manuale for the ASEBA Preschoole Forms and Profiles:*  
33  
34 Burlington, VT: University of Vermont, Research Center for Children, Youth and  
35  
36 Families., 2000.  
37  
38 29. Morrongiello BA, Schell SL, Schmidt S. "Please keep an eye on your younger sister":  
39  
40 sibling supervision and young children's risk of unintentional injury. *Inj prev*  
41  
42 2010;16(6):398-402.  
43  
44  
45 30. Aarnoudse-Moens CS, Weisglas-Kuperus N, van Goudoever JB, et al. Meta-analysis of  
46  
47 neurobehavioral outcomes in very preterm and/or very low birth weight children.  
48  
49 *Pediatrics* 2009;124(2):717-28.  
50  
51  
52 31. Schmidt LA, Miskovic V, Boyle MH, et al. Shyness and timidity in young adults who  
53  
54 were born at extremely low birth weight. *Pediatrics* 2008;122(1):e181-7.  
55  
56  
57  
58  
59  
60

- 1  
2  
3 32. Pfeifer M, Goldsmith HH, Davidson RJ, et al. Continuity and change in inhibited and  
4 uninhibited children. *Child Dev* 2002;73(5):1474-85.  
5  
6  
7 33. Schwebel DC, Plumert JM. Longitudinal and concurrent relations among temperament,  
8 ability estimation, and injury proneness. *Child Dev* 1999;70(3):700-12.  
9  
10  
11 34. Nilsen RM, Vollset SE, Gjessing HK, et al. Self-selection and bias in a large prospective  
12 pregnancy cohort in Norway. *Paediatr Perinat Epidemiol* 2009;23(6):597-608.  
13  
14  
15 35. Pless CE, Pless IB. How well they remember. The accuracy of parent reports. *Arch*  
16  
17  
18  
19  
20  
21 36. Cummings P, Rivara FP, Thompson RS, et al. Ability of parents to recall the injuries of  
22 their young children. *Inj prev* 2005;11(1):43-7.  
23  
24  
25  
26  
27  
28  
29  
30  
31  
32  
33  
34  
35  
36  
37  
38  
39  
40  
41  
42  
43  
44  
45  
46  
47  
48  
49  
50  
51  
52  
53  
54  
55  
56  
57  
58  
59  
60

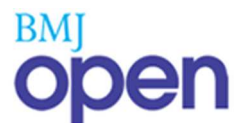

**Familial factors and child characteristics as predictors of injuries in toddlers: A prospective cohort study**

|                                 |                                                                                                                                                                                                                                                                                                                                                                          |
|---------------------------------|--------------------------------------------------------------------------------------------------------------------------------------------------------------------------------------------------------------------------------------------------------------------------------------------------------------------------------------------------------------------------|
| Journal:                        | <i>BMJ Open</i>                                                                                                                                                                                                                                                                                                                                                          |
| Manuscript ID:                  | bmjopen-2011-000740.R1                                                                                                                                                                                                                                                                                                                                                   |
| Article Type:                   | Research                                                                                                                                                                                                                                                                                                                                                                 |
| Date Submitted by the Author:   | 10-Feb-2012                                                                                                                                                                                                                                                                                                                                                              |
| Complete List of Authors:       | Myhre, Mia Cathrine; Norwegian Centre for Violence and Traumatic Stress Studies,<br>Thoresen, Siri; Norwegian Centre for Violence and Traumatic Stress Studies,<br>Grøgaard, Jens; Oslo University Hospital, Department of Pediatrics<br>Dyb, Grete; Norwegian Centre for Violence and Traumatic Stress Studies, ;<br>University of Oslo, Institute of Clinical Medicine |
| <b>Primary Subject Heading</b>: | Paediatrics                                                                                                                                                                                                                                                                                                                                                              |
| Secondary Subject Heading:      | Epidemiology                                                                                                                                                                                                                                                                                                                                                             |
| Keywords:                       | Community child health < PAEDIATRICS, Developmental neurology & neurodisability < PAEDIATRICS, EPIDEMIOLOGY                                                                                                                                                                                                                                                              |
|                                 |                                                                                                                                                                                                                                                                                                                                                                          |

SCHOLARONE™  
Manuscripts

Peer Review Only

1  
2  
3 FAMILIAL FACTORS AND CHILD CHARACTERISTICS AS PREDICTORS OF  
4  
5 INJURIES IN TODDLERS: A PROSPECTIV COHORT STUDY  
6  
7  
8

9 Mia Cathrine Myhre

10 Norwegian Centre for Violence and Traumatic Stress Studies

11 Kirkeveien 166

12 N-0450 OSLO

13 Norway

14 Phone: +47 22 59 55 00, Fax: +47 22 59 55 01

15 E-mail: m.c.myhre@nkvts.unirand.no

16  
17  
18 Mia Cathrine Myhre <sup>A, B</sup>

19 Siri Thoresen <sup>A</sup>

20 Jens Grøgaard <sup>B</sup>

21 Grete Dyb <sup>A, C</sup>

22 Norwegian Centre for Violence and Traumatic Stress Studies, Oslo, Norway <sup>A</sup>

23 Department of pediatrics, Oslo University Hospital - Ullevål, Oslo, Norway <sup>B</sup>

24 Institute of Clinical Medicine, University of Oslo, Oslo, Norway <sup>C</sup>

25  
26  
27  
28  
29  
30  
31  
32  
33  
34  
35  
36  
37  
38  
39  
40  
41  
42  
43  
44  
45  
46  
47 Key words: *epidemiology, injury prevention, the Norwegian Mother and Child Cohort Study*

48  
49 Word Count: 2961



**ABSTRACT**

**Objective:** To identify family and child characteristics that put toddlers at risk of injuries,  
and to assessed the relative importance of child related risk factors compared to familial risk  
factors for injuries in toddlers.

**Design:** A prospective cohort study

**Setting:** This study was based on the Norwegian Mother and Child Cohort Study, conducted  
by the Norwegian Institute of Public Health.

**Participants:** The study sample consisted of 26,087 children and their mothers.

**Outcome measures:** Family and child characteristics measured before or at 18 months of age  
were investigated as potential predictors of hospital-attended injuries that occurred between  
18 and 36 months of age.

**Results:** In the multivariable analysis, younger maternal age OR 0.93 (95% CI 0.86, 1.00),  
financial problems OR 1.18 (95% CI 1.01, 1.39), maternal mental distress OR 1.09 (95% CI  
1.03, 1.16), having older siblings OR 1.22 (95% CI 1.08, 1.39), increased gestational age at  
birth OR 1.04 (95% CI 1.00, 1.07) and male gender OR 1.26 (95% CI 1.11, 1.42) were risk  
factors for hospital-attended injuries. Children with impaired gross motor development had a  
decreased risk of injury OR 0.65 (95% CI 0.42, 0.99), whereas those with impaired fine motor  
development had an increased risk OR 1.55 (95% CI 1.22, 1.97). Shyness was a protective  
factor OR 0.92 (95% CI 0.86, 0.98). Children with three reported attention problems had a  
slightly increased risk of hospital-attended injuries (95% CI OR 1.33 (1.02, 1.72),  $p = 0.035$ ),  
otherwise, behaviour was not a significant risk factor.

**Conclusions:** This study demonstrated that a wide variety of factors was in play as  
predictors of injuries in young children. Both child related factors (gender, gestational age at  
birth, child motor development, shyness, attention) and familial factors (having older siblings,

maternal age, financial difficulties and maternal mental health problems) were associated with injuries in toddlers.

~~The effect sizes of several child related risk factors were substantially attenuated when adjusted for familial risk factors. Conversely, effect estimates for familial risk factors were not much altered following adjustment for child related factors. This study provides support that familial factors are robust predictors of injuries in young children.~~

### Article focus

- To identify characteristics that put toddlers at risk of injuries in a large prospective cohort study.
- ~~Several risk factors related both to the child's family situation and individual characteristics of the child have been identified, and this study assessed both important child-factors and familial factors together. ~~the relative importance of child related risk factors compared to familial risk factors for injuries in toddlers~~~~

### Key Messages

- This longitudinal population-based study of toddlers confirmed that a wide-variety of factors is in play as predictors of injuries.
- Both child related factors (gender, gestational age at birth, child motor development, shyness, attention) and familial factors (having older siblings, maternal age, financial difficulties and maternal mental health problems) were associated with injuries in toddlers.
- ~~The assessment of several familial and child related characteristics together as predictor for hospital attended injuries in toddlers provided evidence that familial factors are more robust predictors of injuries in toddlers than child factors.~~

- 1  
2  
3 • Children with impaired gross motor development had a decreased risk of injury,  
4  
5 whereas those with impaired fine motor development had an increased risk and the  
6  
7 timing of preventive measures against injuries should be based on motor development  
8  
9 in young children and not on age.  
10  
11

### 12 13 14 **Strengths and limitations**

- 15  
16 • The strengths of this study included its prospective design, large sample size and the  
17  
18 inclusion of a large number of potentially important variables.  
19  
20  
21 • A response rate of 42.7% suggests a selection bias, and comparisons with registry data  
22  
23 have shown a positive selection into this cohort.  
24  
25  
26 • This study's reliance on self-reported data may have affected the response accuracy,  
27  
28 and there may be information biases  
29  
30  
31 • The use of abbreviated scales might have threatened the validity of measures.  
32  
33  
34  
35  
36  
37  
38  
39  
40  
41  
42  
43  
44  
45  
46  
47  
48  
49  
50  
51  
52  
53  
54  
55  
56  
57  
58  
59  
60

## INTRODUCTION

Injuries are a major cause of morbidity and mortality in toddlers.[1] The incidence of injury, mechanisms of trauma and type of injury vary with children's ages and developmental stages.[2,3] Before adolescence, the highest rate of injury occurs in toddlers 15-17 months of age.[2] Falls are consistently the leading cause of non-fatal injuries in toddlers, followed by poisoning and transportation-related injuries.[2,3] Wounds and head injuries are the most common types of injury.[3]

Until the 1960s, injuries were considered accidental in the sense of being random acts of misfortune. Although they are still referred to as 'accidents', events that result in injuries are no longer regarded as unpredictable; rather, they are thought to have a causal sequence with identifiable risk factors.[4] Several studies have since reported that risk factors related both to the child's family situation and individual characteristics of the child are associated with injuries in children.

Low familial socioeconomic status[5-7] and related aspects, including low parental education, young maternal age, single motherhood, large family size, unemployment and substance abuse, are established risk factors for injuries in children.[6-8] More recently, researchers have found associations between the mother's mental health and an increased risk of injury in toddlers.[9,10] Adequate adult supervision is essential for toddlers to stay free from harm, [11-13] and mothers mental distress may reduce the ability to meet children's needs and may impact awareness of children's safety. Many unintentional injuries among young children are the results of inadequate supervision. Supervision exist on a spectrum from keeping a child overly protected and thereby denied opportunities to develop towards inadequate supervision and boundary setting exposing a child to avoidable harm.

Male sex is probably the best established risk factor for injury, and gender-specific behaviours such as rough play and taking risks are believed to contribute to this association in

1  
2  
3 children.[14] Potentially important predictors that have received less attention in the literature  
4  
5 include preterm birth and psychomotor development. Many studies have identified cognitive  
6  
7 and behavioural consequences of preterm birth; however, few have examined these  
8  
9 consequences in relation to the risk of later injury. Similarly, the relationship between  
10  
11 psychomotor development and the risk of injury is not well established, as the few studies that  
12  
13 have been conducted show conflicting results.[15-17] However, there is considerable  
14  
15 individual variation in toddlers' motor development, and their physical development precedes  
16  
17 their ability to understand the consequences of their actions. Motor ability may therefore be of  
18  
19 specific importance as a risk factor for injuries in this age group.  
20  
21

22  
23       Temperamental attributes in children have been associated with proneness to injury,  
24  
25 including a high activity level, impulsiveness, sensation seeking and poor inhibitory  
26  
27 control.[14] Each of these traits contributes to children's tendencies to place themselves in  
28  
29 potentially dangerous situations. Externalising behaviours may also be challenging in toddlers  
30  
31 and can affect child safety.[14,18] Attention problems may affect a child's ability to recognise  
32  
33 potential environmental hazards and to comply with their supervisor's instructions and rules.  
34  
35 Aggression and related high levels of oppositional behaviour makes it difficult for parents to  
36  
37 control their children and keep them safe from harm. [14,18-20]  
38  
39

40  
41       ~~Many unintentional injuries among young children are the results of inadequate~~  
42  
43 ~~supervision. Supervision exist on a spectrum from keeping a child overly protected and~~  
44  
45 ~~thereby denied opportunities to develop towards inadequate supervision and boundary setting~~  
46  
47 ~~exposing a child to avoidable harm.[21] Also, some injuries in children are the results from~~  
48  
49 ~~child abuse, and in toddlers, up to 10% of injuries evaluated in emergency departments have~~  
50  
51 ~~been reported to be intentional.~~  
52

53  
54       The aim of this study was to assess ~~the relative importance of important~~ child factors  
55  
56 ~~compared to and~~ familial factors for injuries requiring hospital admission in toddlers.  
57  
58  
59  
60

1  
2  
3 Research, mainly on older children, has identified a range of characteristics of children and  
4  
5 several familial factors as risk factors for injuries in childhood, but few have assessed [them](#)  
6  
7 [together the relative importance of such factors](#) in young children. The Norwegian Mother  
8  
9 and Child Cohort Study (MoBa), with its comprehensive data collection over several waves  
10  
11 offered a unique opportunity to assess these relationships prospectively in a large-scale,  
12  
13 population-based study.  
14  
15

## 18 **METHODS**

### 19 **Design and Participants**

20  
21 This study used data from the Norwegian Mother and Child Cohort Study (MoBa),  
22  
23 conducted by the Norwegian Institute of Public Health. MoBa is a prospective population-  
24  
25 based pregnancy cohort study with a target population of all pregnant women in Norway and  
26  
27 their children. The women were recruited to the study at approximately week 17 of gestation  
28  
29 through postal invitations prior to routine ultrasound examinations at their local hospitals. The  
30  
31 study included 108,000 pregnancies; recruitment began in 1999 and was completed in 2008.  
32  
33 The response rate was 42.7% .[21] Questionnaire data were collected at gestational weeks 17  
34  
35 and 30 and at child ages of 6, 18, and 36 months. Information from the MBRN was also  
36  
37 available ([www.fhi.no/mfr](http://www.fhi.no/mfr)). Informed consent was obtained from each participant upon  
38  
39 recruitment. The Regional Committee for Medical Research Ethics and the Norwegian Data  
40  
41 Inspectorate approved the study. Details of the MoBa study's sampling, design,  
42  
43 questionnaires, informed consent processes, and data collection strategies have been reported  
44  
45 elsewhere ([www.fhi.no/morogbarn](http://www.fhi.no/morogbarn)).[21]  
46  
47  
48  
49  
50

51 Although recruitment to the study is complete, data collection is an on-going process.  
52  
53 The current study is based on data files released for research on February 2009. This file  
54  
55 comprised the first 27,227 children and their mothers who had completed the questionnaires  
56  
57 when their children were 36 months of age. Cases with missing data on hospital attended  
58  
59  
60

1  
2  
3 injuries in the children were excluded (N = 1,140), and the study sample comprised 26,087  
4  
5 children and mothers.  
6  
7

### 9 10 **Injuries**

11 At 36 months of age, injuries in toddlers were assessed using the following questions:  
12 “Has your child suffered any injury or accident since the age of 18 months?” and “If yes, has  
13 the child been admitted to or examined in hospital?” The response categories to both items  
14 were “yes” or “no”. The outcome variable in our study was an affirmative answer for  
15 hospital-attended injuries.  
16  
17  
18  
19  
20  
21  
22  
23  
24

### 25 **Familial factors**

26 Demographic information regarding older siblings, maternal age, maternal education, and  
27 occupational status was reported at gestational week 17. At child’s age 18 months, whether  
28 the mother and child lived with the child’s father was assessed with the following question:  
29 “Do you and your child live with your child’s father?” Current financial problems were  
30 assessed with the following questions: “Have you had financial problems since the previous  
31 questionnaire?” The response categories were “yes” or “no”. Data on ethnicity were not  
32 available at the individual level in this study; however, the MoBa cohort comprised  
33 predominantly ethnic Norwegian and Scandinavian families (95%).  
34  
35  
36  
37  
38  
39  
40  
41  
42  
43  
44

### 45 *Maternal mental health*

46  
47 The mother’s mental health was assessed when the child was 18 months of age with  
48 the Symptom Checklist SCL-8.[22,23] The SCL-8 is designed to measure psychological  
49 distress, particularly anxiety and depression, in population surveys. Each item has four  
50 response categories, ranging from “not at all”=1 to “severe”=4.[24] Cronbach’s  $\alpha$  was 0.84.  
51  
52  
53  
54  
55  
56  
57  
58  
59  
60

### Child factors

Information regarding the child's sex, birth weight, and gestational age was retrieved from the MBRN. Births before gestational age of 37 weeks were classified as preterm births.

#### *Child development*

Development was assessed using items derived from the Norwegian version of the Ages and Stages Questionnaire (ASQ). The ASQ was designed for first-level screening and to monitor developmental delay in children.[25] When the child was 18 months of age, development was assessed using three items from the gross motor area (Cronbach's  $\alpha = 0.63$ ), three items from the fine motor area (Cronbach's  $\alpha = 0.30$ ), three items from the communication area (Cronbach's  $\alpha = 0.59$ ), and four items from the personal-social area (Cronbach's  $\alpha = 0.50$ ) of the ASQ 18 months form. Due to poor internal consistency these measures were analysed as categorical variables. The choice of responses was "not yet", "sometimes" or "yes".

Responses of "not yet" and "sometimes" are indicative of delayed development and were categorised jointly as "not yet". The number of developmental skills that were not achieved was summarised, and the following 3 categories were formed: "all skills achieved", "one skill not achieved" and "two or more skills not achieved".

#### *Child temperament*

The Emotionality, Activity, Shyness, and Sociability Temperament Survey for Children (EAS)[26] was used to assess temperament at 18 months of age. Three items from each of the emotionality, activity, and shyness subscales were included. "Emotionality" refers to the tendency to become easily and intensely aroused or upset. "Activity" refers to the preferred level of activity and speed of action. "Shyness" refers to the tendency to be inhibited and awkward in new social situations. Each item was rated using a five-point scale, ranging from "not typical" = 1 to "very typical" = 5. Cronbach's  $\alpha$  was 0.64 for emotionality, 0.64 for activity, and 0.65 for shyness.



### *Child behaviour*

Child externalising behaviour was assessed using items from the Child Behaviour Checklist (CBCL) for ages 1.5 to 5 years[27] when the child reached 18 months of age. Five items assessing aggressiveness and three items assessing attention problems were available.

Cronbach's  $\alpha$  was 0.44 for the aggressive subscale and 0.59 for the attention subscale. Due to poor internal consistency these measures were analysed as categorical variables. All items

were rated "not true", "somewhat or sometimes true", and "very true or often true".

"Somewhat or sometimes true" and "very true or often true" were categorised together to indicate problem behaviours. The number of problems were summarised and then categorised as "no problems", one, two or three problems for the attention subscale and one, two or three or more problems for the aggressiveness subscale.

### **Statistical Analysis**

Predictors of hospital-attended injuries in children were analysed using logistic regression with a Generalised Estimating Equation (GEE) approach to account for correlation due to the inclusion of siblings in the study sample. Associations are presented as crude odds ratios (cORs) and adjusted odds ratios (aORs) with 95% confidence intervals [95% CI]. The corresponding tests for significance were performed using the Wald-test statistic and a significance level of  $P < 0.05$ . The sum scores of independent continuous measures were standardised, and the presented odds ratios represent the difference in risk for an increase of one standard deviation. Measures with internal consistency of Cronbach's  $\alpha < 0.60$  were categorised. Variance inflation factors were computed to assess multicollinearity. The model was cross-validated in two randomly selected subsamples. Stratification by gender produced only minor differences in effect estimates of potential risk factors. The rate of missing

1  
2  
3 information ranged from 0% to 11.9%. Modelling was based on 20 multiply imputed datasets.  
4  
5 Multivariate Imputation by Chained Equations (MICE) was used for imputations.  
6  
7 All analyses were performed using R (The R Foundation for Statistical Computing, Vienna,  
8  
9 Austria) with the R packages gee for logistic regression using GEE, and MICE for multiple  
10  
11 imputation.  
12  
13

## 14 15 16 17 **RESULTS**

18  
19 The study sample comprised 50.7% males, with 53% of the children having older  
20  
21 siblings. The mean gestational age at birth was 39.4 weeks (SD = 2.0). Maternal age ranged  
22  
23 from 14 to 47 years, with a mean of 29.7 years (SD = 4.4). The majority of mothers (60.5%)  
24  
25 had more than 12 years of education. Only 0.9% of the subjects (N = 252) were teenage  
26  
27 mothers, and 3.4% (N=853) reported not living with the father of their child. Four per cent of  
28  
29 mothers were unemployed or disabled. Current financial problems were reported by 18.5% of  
30  
31 mothers. A hospital-attended injury between 18 and 36 months of age was reported for 4.6%  
32  
33 (N = 1,247) of the children.  
34  
35

36  
37 Table 1 displays univariable and multivariable comparisons between children with and  
38  
39 without hospital-attended injuries. In unadjusted analyses, a range of factors were  
40  
41 significantly associated with injuries, including maternal mental distress, financial problems,  
42  
43 gender, gestational age at birth, development, temperament and behaviour. Children born  
44  
45 preterm had a decreased risk of injury (OR = 0.74 95% CI (0.56, 0.96), p = 0.024).  
46  
47

48  
49 Similarly, several potential predictors were significantly associated with hospital-  
50  
51 attended injuries in toddlers in the multivariable analyses.

### 52 *Familial factors*

53  
54  
55 In the adjusted model, financial problems, maternal mental distress and having older  
56  
57 siblings were risk factors for hospital-attended injuries in toddlers. Older maternal age was a  
58  
59

protective factor. Maternal education, occupational status and not living with the child's father were not associated with hospital-attended injuries.

### *Child factors*

Male gender and increased gestational age at birth were risk factors for hospital-attended injuries in the toddlers. Children with impaired gross motor development were less prone to injury, whereas children with less fine motor skills were more at risk. Social development was not significantly associated with hospital-attended injuries. Impaired communication, the temperamental traits of emotionality and activity and aggressive behaviour did not achieve statistical significance in the adjusted analysis. Following adjustment shyness remained a protective factor and children with at least three reported attention problems had a modestly increased risk for hospital-attended injuries ( $p = 0.035$ ).

**Table 1**

Descriptive comparison between children with and without hospital attended injuries and univariable and multivariable logistic regression analysis of potential risk factors, N=26087.

|                                             | Overall<br>N=26087 | Without injuries | With<br>injuries | OR (95% CI)         | aOR (95% CI)        |
|---------------------------------------------|--------------------|------------------|------------------|---------------------|---------------------|
|                                             | % (N)              | % (N)            | % (N)            |                     |                     |
|                                             | /mean(SD)          | /mean(SD)        | /mean(SD)        |                     |                     |
| <i>Family factors</i>                       |                    |                  |                  |                     |                     |
| Older sibling(s)                            | 53.3% (13902)      | 53.1% (13197)    | 56.5% (705)      | 1.15 (1.02, 1.29) * | 1.22 (1.08, 1.39)** |
| Maternal age                                | 29.7 (4.43)        | 29.7 (4.44)      | 29.5 (4.44)      | 0.95 (0.89, 1.02)   | 0.93 (0.86, 1.00)*  |
| Maternal education $\leq$ 12 years          | 37.6% (9534)       | 37.6% (9078)     | 37.6% (456)      | 0.99 (0.88, 1.12)   | 0.90 (0.80, 1.02)   |
| Mother unemployed or disabled               | 4.1% (1069)        | 4.1% (1017)      | 4.2% (52)        | 1.01 (0.76, 1.36)   | 0.95 (0.71, 1.26)   |
| Mother and child not living with the father | 3.4% (819)         | 3.4% (778)       | 3.6% (41)        | 1.06 (0.77, 1.46)   | 0.96 (0.69, 1.33)   |
| Financial problems                          | 18.6% (4379)       | 18.4% (4129)     | 22.4% (250)      | 1.27 (1.09, 1.48)** | 1.18 (1.01, 1.39)*  |

|                                        |               |               |             |                      |                      |
|----------------------------------------|---------------|---------------|-------------|----------------------|----------------------|
| Maternal mental health problems (8-32) | 10.2 (2.84)   | 10.1 (2.82)   | 10.5 (3.06) | 1.12 (1.06, 1.18)*** | 1.09 (1.03, 1.16)**  |
| <i>Child factors</i>                   |               |               |             |                      |                      |
| Male                                   | 50.8% (13250) | 50.5% (12540) | 56.9% (710) | 1.30 (1.16, 1.45)*** | 1.26 (1.11, 1.42)*** |
| Gestational age                        | 39.4 (1.94)   | 39.4 (1.96)   | 39.5 (1.79) | 1.04 (1.01, 1.07) *  | 1.04 (1.00, 1.07)*   |
| Gross motor development                |               |               |             |                      |                      |
| All skills achieved                    | 82.2% (19742) | 82.1% (18794) | 83.8% (948) | Reference            | Reference            |
| One skill not achieved                 | 14.5% (3481)  | 14.5% (3322)  | 14.1% (159) | 0.94 (0.80, 1.12)    | 0.94 (0.79, 1.12)    |
| Two or three skills not achieved       | 3.4% (800)    | 3.4% (776)    | 2.1% (24)   | 0.65 (0.43, 0.98)*   | 0.65 (0.42, 0.99)*   |
| Fine motor development                 |               |               |             |                      |                      |
| All skills achieved                    | 73.8% (17569) | 73.9% (16754) | 72.3% (815) | Reference            | Reference            |
| One skill not achieved                 | 21.0% (5004)  | 21.0% (4774)  | 20.4% (230) | 1.01 (0.87, 1.18)    | 1.03 (0.89, 1.19)    |
| Two or three skills not achieved       | 5.2% (1236)   | 5.1% (1154)   | 7.3% (82)   | 1.45 (1.15, 1.83) ** | 1.55 (1.22, 1.97)*** |
| Communication development              |               |               |             |                      |                      |
| All skills achieved                    | 46.6% (11117) | 46.8% (10631) | 43.1% (486) | Reference            | Reference            |
| One skill not achieved                 | 26.5% (6313)  | 26.4% (5989)  | 28.7% (324) | 1.16 (1.00, 1.34) *  | 1.11 (0.95, 1.28)    |
| Two or three skills not achieved       | 26.93% (6413) | 18.3% (6095)  | 19.3% (318) | 1.13 (0.98, 1.31)    | 1.04 (0.89, 1.22)    |
| Social development                     |               |               |             |                      |                      |
| All skills achieved                    | 71.3% (17094) | 71.4% (16302) | 70.3% (792) | Reference            | Reference            |
| One skill not achieved                 | 19.6% (4688)  | 19.5% (4451)  | 21.0% (237) | 1.09 (0.94, 1.27)    | 1.04 (0.90, 1.21)    |
| Two or more skill not achieved         | 6.6% (1582)   | 6.6% (1510)   | 6.4% (72)   | 0.99 (0.77, 1.26)    | 0.92 (0.73, 1.15)    |
| Temperament                            |               |               |             |                      |                      |
| Activity (3-15)                        | 12.1 (1.96)   | 12.1 (1.96)   | 12.2 (1.97) | 1.09 (1.02, 1.16) ** | 1.02 (0.95, 1.09)    |
| Emotionality (3-15)                    | 8.2 (2.27)    | 8.2 (2.26)    | 8.3 (2.37)  | 1.06 (0.99, 1.12)    | 1.02 (0.96, 1.09)    |
| Shyness (3-15)                         | 6.1 (1.93)    | 6.1 (1.93)    | 6.0 (1.95)  | 0.92 (0.87, 0.98)**  | 0.92 (0.86, 0.98) *  |
| Externalizing behaviour                |               |               |             |                      |                      |
| Attention                              |               |               |             |                      |                      |
| No attention problem                   | 10.7% (2464)  | 10.8% (2371)  | 8.7% (93)   | Reference            | Reference            |
| One attention problem                  | 41.9% (9653)  | 42.1% (9231)  | 39.3% (422) | 1.15 (0.91, 1.44)    | 1.13 (0.89, 1.43)    |
| Two attention problems                 | 28.7% (6611)  | 28.7% (6288)  | 30.0% (323) | 1.26 (1.00, 1.60)    | 1.19 (0.93, 1.53)    |
| Three attention problems               | 18.7% (4294)  | 18.5% (4057)  | 22.0% (237) | 1.47 (1.16, 1.86)**  | 1.33 (1.02, 1.72) *  |
| Aggression                             |               |               |             |                      |                      |
| No aggression problem                  | 14.6% (3278)  | 14.6% (3151)  | 12.1% (127) | Reference            | Reference            |

|                                   |              |              |             |                   |                   |
|-----------------------------------|--------------|--------------|-------------|-------------------|-------------------|
| One aggression problem            | 22.8% (5953) | 26.3% (5685) | 25.5% (268) | 1.13 (0.92, 1.38) | 1.07 (0.87, 1.31) |
| Two aggression problems           | 24.3% (6332) | 27.9% (6018) | 29.8% (314) | 1.21 (0.99, 1.47) | 1.09 (0.89, 1.34) |
| Three or more aggression problems | 27.2% (7091) | 31.2% (6747) | 32.7% (344) | 1.21 (1.00, 1.47) | 1.01 (0.82, 1.25) |

\* p value < 0.05, \*\*p value < 0.01, \*\*\*p value < 0.001 from Wald-test statistic

## DISCUSSION

Injuries in toddlers are multifaceted phenomena with a wide variety of relevant risk-factors in play. The current population-based study of toddlers found that both familial factors and developmental factors in children were associated with injury risk, ~~but that familial factors were more robust predictors of injuries. These findings are e~~ Consistent with previous studies and our clinical experience; children admitted to hospitals with injuries are not randomly selected.

Similar to earlier studies,[8] having older siblings was a risk factor for hospital-attended injuries. Differences in parental supervision or the possibility that older siblings sometimes act as supervisors may explain this association. Older siblings may also act as models of risky behaviour. Research has shown that children are allowed to engage in more risky behaviour and show poor compliance when supervised by their older siblings rather than by their mothers.[28]

Education and socioeconomic status are closely intertwined, and most prior studies have found that low maternal education is a risk factor for injuries in children. In this study, maternal education, unemployment and single parenthood were not associated with injury. This lack of association may be due to the generally high educational level, well-developed social security system, and high standard of living in Norway. Financial problems, which were significantly associated with injury, were reported by a rather large proportion of the

1  
2  
3 mothers in this study and are not likely to represent poverty, but perhaps problems to adapt to  
4  
5 a life situation with a growing family. As in other studies older maternal age was a protective  
6  
7 factor.[6,7]  
8

9  
10 In line with previous research maternal mental health problems constituted a risk  
11  
12 factor for injuries in children.[9,10] Mental distress may reduce a parent's attention to  
13  
14 external cues, and may negatively impact the parent-child relationship. Maternal mental  
15  
16 distress withstood adjustment for other familial and child-related predictors. This observation  
17  
18 calls for further investigation of the mechanisms involved.  
19

20  
21 Behavioural and temperamental differences between boys and girls have been  
22  
23 proposed as explanations for the well-established relationship between gender and injury risk.  
24  
25 In this study, adjustment for development, temperament, and behaviour did barely attenuate  
26  
27 this relationship. Perhaps other differences, for example gender-specific socialisation,  
28  
29 supervision and guidance, games and encouraged activities, might explain this disparity.  
30

31  
32 Our finding that the risk of injury was increased with increasing gestational age at  
33  
34 birth, and that preterm birth was associated with a decreased risk was unanticipated. Many  
35  
36 studies have identified later behavioural problems, including attention deficit and  
37  
38 hyperactivity in children who are born preterm, [29] attributes that are also linked to injury  
39  
40 proneness. On the other hand studies of adolescents have suggested that children born at  
41  
42 extremely low birth weight are more cautious, shy and risk averse than their normal birth  
43  
44 weight counterparts [30], and our finding might be explained by such attributes. More  
45  
46 research is needed to confirm and explain this finding.  
47  
48

49  
50 Novel findings in this study were that children with impaired gross motor development  
51  
52 had a decreased risk for injury, whereas those with impaired fine motor development had an  
53  
54 increased risk. Toddlers' physical development often precedes their ability to understand the  
55  
56 consequences of their actions, and early physical mobility may put children at greater risk of  
57  
58  
59  
60

1  
2  
3 injury, regardless of their temperament, behaviour or environment. Impaired fine motor  
4  
5 development may be linked to clumsiness, which subsequently leads to injury proneness.  
6  
7 Alternatively, early fine motor development may reflect a preference for calmer activities.  
8  
9  
10 The different directionalities of the associations between gross and fine motor development  
11  
12 and injury risk imply that these areas should be assessed separately in future studies.  
13

14 Shyness was a consistent protective factor against injury. Shyness is considered to be  
15  
16 an inhibition to the unfamiliar and is associated with inhibitory control.[31,32] The protective  
17  
18 effect of shyness observed in this study indicates that inhibitory control may also be a  
19  
20 protective factor against injury in young children. Attention problems was borderline  
21  
22 significant after adjustment and may be a risk factor for injuries in toddlers. Aggression was  
23  
24 not significant. These findings are different from the many studies of older children  
25  
26 concluding with behaviour as a predictor for injuries.[14,18-20] This disparity may be due to  
27  
28 measurement difficulties at this early age, or lack of stability in aggressive behaviour in the  
29  
30 developmental period in this study (18 and 36 months). In our study the associations between  
31  
32 temperament and behavior, and injury were substantially attenuated following adjustment,  
33  
34 perhaps indicating when adjusted for family factors without the contrary being observed. This  
35  
36 finding provides support that other familial factors may be are more robust predictors of  
37  
38 injuries in young children.  
39  
40  
41  
42

43 There are some important limitations of this study. A response rate of 42.7% suggests  
44  
45 a selection bias, and comparisons with data from MBRN have shown a positive selection into  
46  
47 this cohort, [21,33] and the study sample can be regarded as a low-risk population; this fact  
48  
49 may have resulted in an underestimation of the true effect sizes. However, few significant  
50  
51 differences in exposure-outcome associations have been identified in studies of this  
52  
53 cohort,[33] and the positive associations found in this study is likely to be generalizable.  
54  
55  
56  
57  
58  
59  
60

1  
2  
3 This study's reliance on self-reported data may have affected the response accuracy.  
4  
5 Self-reported medically-attended or hospital-attended injuries are common measures in the  
6  
7 injury literature. However, injury recall has been shown to decrease with time and tends to be  
8  
9 more accurate for major injuries.[34,35] The expected over-representation of more recent  
10  
11 injuries and more severe injuries will however not affect the association measures. The  
12  
13 division into children with and without hospital attended injuries leaves children with injuries  
14  
15 treated in out-patient clinics in the comparison group, and may have led to an underestimation  
16  
17 of effects. There may also be selection biases regarding injury severity and type of injuries  
18  
19 which are treated in out-patient clinics. Especially, regional differences with more severe  
20  
21 injuries treated in out-patient clinics in rural areas are expected. Our study did not include  
22  
23 systematic measures of injury severity, injury mechanism or injury type. Another omitted  
24  
25 variable in this study was adult supervision, which is an important factor in preventing  
26  
27 injuries in preschool children. This study was also unable to discriminate injuries that resulted  
28  
29 from abuse.  
30  
31  
32  
33

34 The sample predominantly comprised ethnic Norwegian participants, and did not  
35  
36 allow us to investigate the influence of ethnicity or culture. As in other large population  
37  
38 studies, there was extensive use of abbreviated scales that might threaten the validity of  
39  
40 measures. The strengths of this study included its prospective design, large sample size and  
41  
42 the inclusion of a large number of potentially important variables.  
43  
44

45 An injury brings the family in contact with healthcare and gives professionals an  
46  
47 opportunity to identify potential risk factors. In addition, the fact that injuries may also be  
48  
49 caused by poor supervision and, sometimes neglect or abuse emphasize that a thorough  
50  
51 assessment of the circumstances surrounding injuries in young children is important to  
52  
53 identify families where children are at risk of further injury.  
54  
55  
56  
57  
58  
59  
60



## Acknowledgements

We are grateful to all the participating families in Norway who take part in this on-going cohort study.

**Competing Interest:** None to declare

## Contributorship

MCM cleaned and analysed the data, and drafted and revised the paper. ST, JBG and GD contributed to the interpretation of the data and critical revisions of the manuscript. All authors have studied the manuscript in the form submitted, and have accepted the order of authorship.

## Copyright

The Corresponding Author, Mia Cathrine Myhre, has the right to grant on behalf of all authors and does grant on behalf of all authors, an exclusive licence on a worldwide basis to the BMJ Publishing Group Ltd, and its Licensees to permit this article (if accepted) to be published in Injury Prevention and any other BMJ PGL products and to exploit all subsidiary rights, as set out in our licence.”

## Funding

The Norwegian Mother and Child Cohort Study is supported by the Norwegian Ministry of Health and the Ministry of Education and Research, NIH/NIEHS(contract no NO-ES-75558), NIH/NINDS (grant no.1 UO1 NS 047537-01), and the Norwegian Research Council/FUGE (grant no. 151918/S10). The current study did not receive any specific funding, but was conducted as part of the authors’ employment at the Norwegian Centre for Violence and Traumatic Stress Studies.

## References

1. Dowd MD, Keenan HT, Bratton SL. Epidemiology and prevention of childhood injuries. *Critical care medicine* 2002;30(11 Suppl):S385-92.
2. Agran PF, Anderson C, Winn D, et al. Rates of pediatric injuries by 3-month intervals for children 0 to 3 years of age. *Pediatrics* 2003;111(6 Pt 1):92.
3. Flavin MP, Dostaler SM, Simpson K, et al. Stages of development and injury patterns in the early years: a population-based analysis. *BMC public health* 2006;6:187.
4. Haddon W. The changing approach to the epidemiology, prevention, and amelioration of trauma: the transition to approaches etiologically rather than descriptively based. *American journal of public health and the nation's health* 1968;58(8):1431-8.
5. Faelker T, Pickett W, Brison RJ. Socioeconomic differences in childhood injury: a population based epidemiologic study in Ontario, Canada. *Injury prevention* 2000;6(3):203-8.
6. Hjern A, Ringback-Weitof G, Andersson R. Socio-demographic risk factors for home-type injuries in Swedish infants and toddlers. *Acta Paediatrica* 2001;90(1):61-8.
7. Laursen B, Nielsen JW. Influence of sociodemographic factors on the risk of unintentional childhood home injuries. *European Journal of Public Health* 2008;18(4):366-70.
8. Bijur PE, Golding J, Kurzon M. Childhood accidents, family size and birth order. *Social Science & Medicine* 1988;26(8):839-43.
9. Phelan K, Khoury J, Atherton H, et al. Maternal depression, child behavior, and injury. *Injury prevention* 2007;13(6):403-8.
10. Schwebel DC, Brezaussek CM. Chronic maternal depression and children's injury risk. *Journal of Pediatric Psychology* 2008;33(10):1108-16.
11. Morrongiello BA, Corbett M, Brison RJ. Identifying predictors of medically-attended injuries to young children: do child or parent behavioural attributes matter? *Injury prevention* 2009;15(4):220-5.
12. Schwebel DC, Brezaussek CM, Ramey SL, et al. Interactions between child behavior patterns and parenting: implications for children's unintentional injury risk. *Journal of Pediatric Psychology* 2004;29(2):93-104.
13. Morrongiello BA, Klemencic N, Corbett M. Interactions between child behavior patterns and parent supervision: implications for children's risk of unintentional injury. *Child Development* 2008;79(3):627-38.
14. Schwebel DC, Gaines J. Pediatric unintentional injury: behavioral risk factors and implications for prevention. *Journal of Developmental & Behavioral Pediatrics* 2007;28(3):245-54.
15. Manheimer DI, Mellinger GD. Personality characteristics of the child accident repeater. *Child Development* 1967;38(2):491-513.
16. Angle CR. Locomotor skills and school accidents. *Pediatrics* 1975;56(5):819-22.
17. Schwebel DC, Binder SC, Sales JM, et al. Is there a link between children's motor abilities and unintentional injuries? *Journal of Safety Research* 2003;34(2):135-41.
18. Wazana A. Are there injury-prone children? A critical review of the literature. *Canadian Journal of Psychiatry* 1997;42(6):602-10.
19. Bijur PE, Stewart-Brown S, Butler N. Child behavior and accidental injury in 11,966 preschool children. *American Journal of Diseases of Children* 1986;140(5):487-92.
20. Byrne JM, Bawden HN, Beattie T, et al. Risk for injury in preschoolers: relationship to attention deficit hyperactivity disorder. *Child Neuropsychology* 2003;9(2):142-51.
21. Magnus P, Irgens LM, Haug K, et al. Cohort profile: the Norwegian Mother and Child Cohort Study (MoBa). *International Journal of Epidemiology* 2006;35(5):1146-50.

- 1
  - 2
  - 3
  - 4
  - 5
  - 6
  - 7
  - 8
  - 9
  - 10
  - 11
  - 12
  - 13
  - 14
  - 15
  - 16
  - 17
  - 18
  - 19
  - 20
  - 21
  - 22
  - 23
  - 24
  - 25
  - 26
  - 27
  - 28
  - 29
  - 30
  - 31
  - 32
  - 33
  - 34
  - 35
  - 36
  - 37
  - 38
  - 39
  - 40
  - 41
  - 42
  - 43
  - 44
  - 45
  - 46
  - 47
  - 48
  - 49
  - 50
  - 51
  - 52
  - 53
  - 54
  - 55
  - 56
  - 57
  - 58
  - 59
  - 60
22. Tambs K, Moum T. How well can a few questionnaire items indicate anxiety and depression? *Acta Psychiatrica Scandinavica* 1993;87(5):364-7.
23. Strand BH, Dalgard OS, Tambs K, et al. Measuring the mental health status of the Norwegian population: a comparison of the instruments SCL-25, SCL-10, SCL-5 and MHI-5 (SF-36). *Nordic Journal of Psychiatry* 2003;57(2):113-8.
24. Sandanger I, Moum T, Ingebrigtsen G, et al. Concordance between symptom screening and diagnostic procedure: the Hopkins Symptom Checklist-25 and the Composite International Diagnostic Interview I. *Social Psychiatry and Psychiatric Epidemiology* 1998;33(7):345-54.
25. Squires J PL, Bricker D *The ASQ User's Guide for the Ages and Stages Questionnaires: A Parent- Completed, Child Monitoring System*. Baltimore, MD: Paul H. Brookes., 1999.
26. Mathiesen KS, Tambs K. The EAS temperament questionnaire--factor structure, age trends, reliability, and stability in a Norwegian sample. *Journal of Child Psychology and Psychiatry* 1999;40(3):431-9.
27. Aschenbach TM, Rescorla LA. *Manuale for the ASEBA Preschoole Forms and Profiles*: Burlington, VT: University of Vermont, Research Center for Children, Youth and Families., 2000.
28. Morrongiello BA, Schell SL, Schmidt S. "Please keep an eye on your younger sister": sibling supervision and young children's risk of unintentional injury. *Injury prevention* 2010;16(6):398-402.
29. Aarnoudse-Moens CS, Weisglas-Kuperus N, van Goudoever JB, et al. Meta-analysis of neurobehavioral outcomes in very preterm and/or very low birth weight children. *Pediatrics* 2009;124(2):717-28.
30. Schmidt LA, Miskovic V, Boyle MH, et al. Shyness and timidity in young adults who were born at extremely low birth weight. *Pediatrics* 2008;122(1):e181-7.
31. Pfeifer M, Goldsmith HH, Davidson RJ, et al. Continuity and change in inhibited and uninhibited children. *Child Development* 2002;73(5):1474-85.
32. Schwebel DC, Plumert JM. Longitudinal and concurrent relations among temperament, ability estimation, and injury proneness. *Child Development* 1999;70(3):700-12.
33. Nilsen RM, Vollset SE, Gjessing HK, et al. Self-selection and bias in a large prospective pregnancy cohort in Norway. *Paediatric and Perinatal Epidemiology* 2009;23(6):597-608.
34. Pless CE, Pless IB. How well they remember. The accuracy of parent reports. *Archives of Pediatrics and Adolescent Medicine* 1995;149(5):553-8.
35. Cummings P, Rivara FP, Thompson RS, et al. Ability of parents to recall the injuries of their young children. *Injury prevention* 2005;11(1):43-7.
